# Supplementary material for: Exploration of a novel triazine-based covalent organic framework for solid-phase extraction of antibiotics
Source: Royal Society of Chemistry journal article supplement (doi:10.1039/c9ra10846g), 2020-01-01
Supplement: c9ra10846g1.pdf [file c9ra10846g1.pdf]

## Exploration of a novel triazine-based covalent organic framework for solid-phase extraction of antibiotics

Guanhua Wang<sup>\*a</sup>, Tong Zhou<sup>a</sup>, Yongqian Lei<sup>\*b</sup>

<sup>a</sup>College of Veterinary Medicine, South China Agricultural University, Guangzhou 510642, Guangdong, PR China. E-mail: ghwang@scau.edu.cn; Tel: +86-02085280234

<sup>b</sup>Guangdong Provincial Key laboratory of Emergency Test for Dangerous Chemicals, Guangdong Engineering Technology Research Center of On-line Monitoring of Water Environmental Pollution, Guangdong Institute of Analysis, Guangzhou, 510070. E-mail: lyq0117@163.com; Tel: +86-02037656885

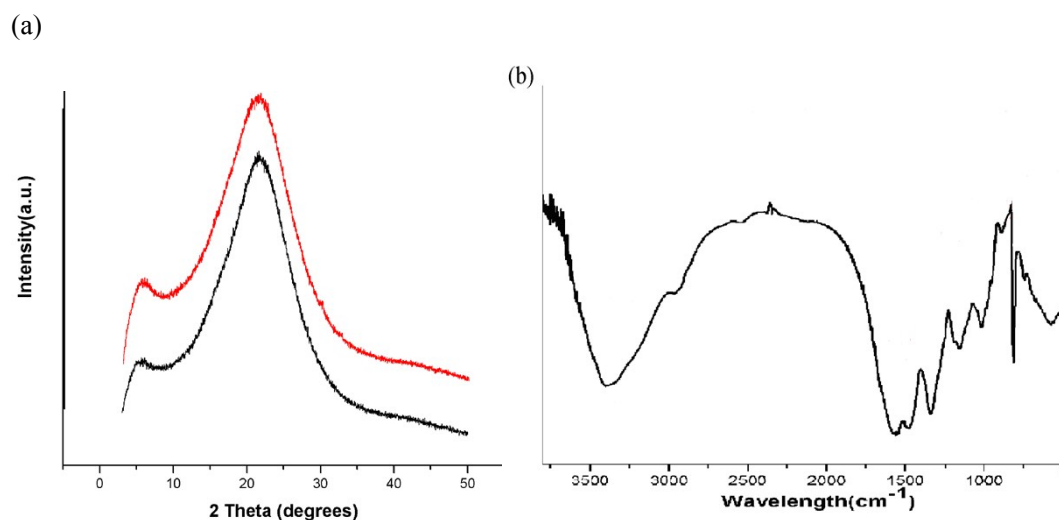

Fig.S1 (a)the PXRD pattern of SCAU-1(red) and SNW-1(black); (b) the IR pattern of SNW-1.

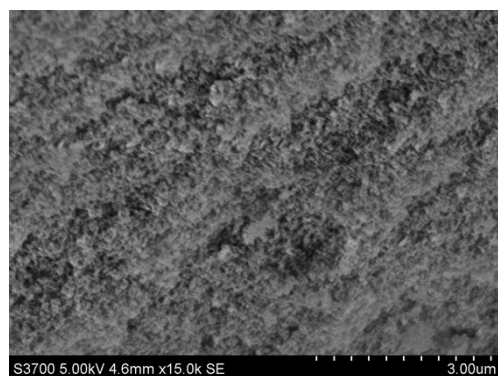

Fig.S2 The SEM of SNW-1

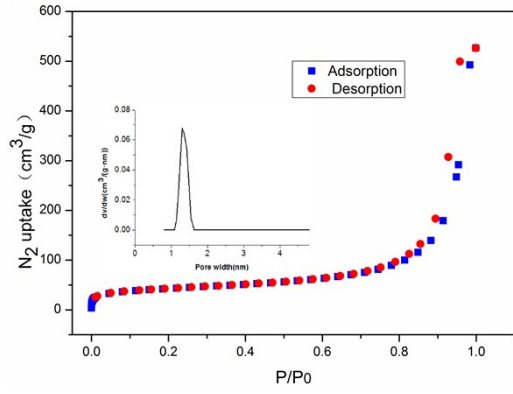

Fig.S3 Nitrogen adsorption/desorption at 77 K of the SNW-1 powder.

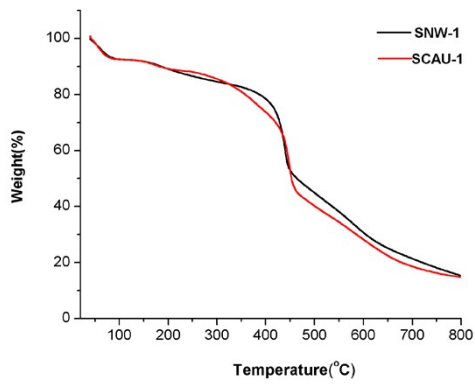

Fig.S4 The TGA pattern of the two COFs

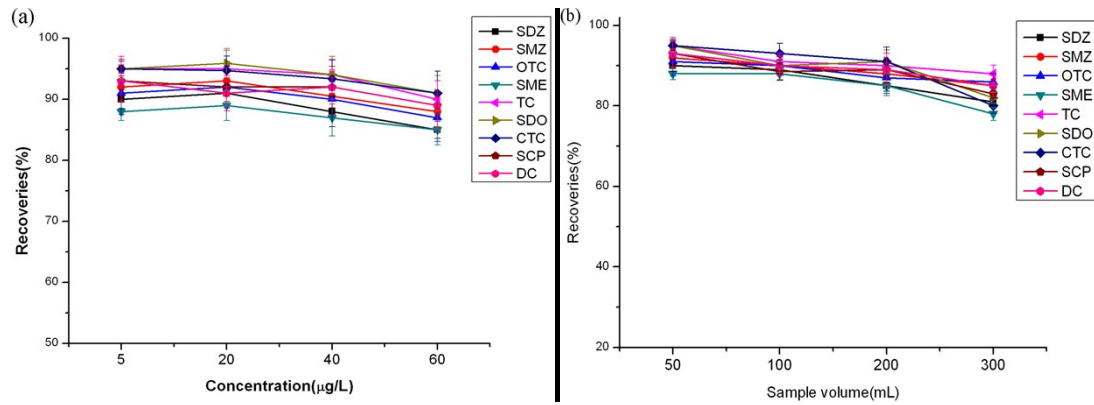

Fig.S5 (a) The loading capacity of 50mL water sample; (b) the breakthrough volume of water sample.

Table S1 The elution gradient of measurement by UPLC-MS/MS( A is water and 0.1% formic acid, B is acetonitrile and 0.1% formic acid )

| Time<br>(min) | A% | B%  |
|---------------|----|-----|
| 0             | 90 | 10  |
| 4             | 90 | 10  |
| 6             | 60 | 40  |
| 6.1           | 0  | 100 |
| 8             | 0  | 100 |
| 8.1           | 90 | 10  |
| 10            | 90 | 10  |

Table .S2 The measurement condition of the analysts

| Name | Structure | Parent ion-<br>Daughter ion(m/z) | Cone/v | CE/v | RT<br>(min)        | SNW-1                       |                       |      |
|------|-----------|----------------------------------|--------|------|--------------------|-----------------------------|-----------------------|------|
|      |           |                                  |        |      |                    | Recoveries (%) <sup>a</sup> | RSD(n=3) <sup>a</sup> |      |
| SDZ  |           |                                  |        |      | 251.3-92.1*/156.0  | 22                          | 13                    | 1.12 |
| 91.1 | 2.2       |                                  |        |      |                    |                             |                       |      |
| SMZ  |           |                                  |        |      | 279.3-124.1*/156.0 | 12                          | 14                    | 1.79 |
| 93.3 | 2.8       |                                  |        |      |                    |                             |                       |      |

|      |     |                     |      |    |      |
|------|-----|---------------------|------|----|------|
| OTC  |     | 461.2-426.1*/443.1  | 25   | 28 | 2.15 |
| 81.9 | 3.3 |                     |      |    |      |
| SME  |     | 281.3-92.1*/156.0   | 14   | 16 | 2.34 |
| 91.8 | 3.8 |                     |      |    |      |
| TC   |     | 445.1-410.1*/427.1  | 28   | 30 | 2.63 |
| 87.0 | 3.5 |                     |      |    |      |
| SDO  |     | 311.3-92.1*/108.1   | 15   | 16 | 4.85 |
| 92.2 | 4.2 |                     |      |    |      |
| CTC  |     | 479.1-154.2*/ 444.2 | 28   | 30 | 5.38 |
| 88.0 | 5.5 |                     |      |    |      |
| SCP  |     | 285.01-108.0*/156.0 | 25   | 15 | 6.17 |
| 93.7 | 3.8 |                     |      |    |      |
| DC   |     | 445.1-167.0*/410.1  | 26   | 28 | 6.52 |
|      |     |                     | 89.1 |    | 4.1  |

---

\*stands for quantification ion

<sup>a</sup>spiked level=5  $\mu$  g.L<sup>-1</sup>
